# Supplementary material for: Cognitive impairment and associated risk factors in older adult hemodialysis patients: a cross-sectional survey
Source: PubMed Central journal article supplement (PMC7385128; doi:10.1038/s41598-020-69482-1), 2020-07-27
Supplement: 41598_2020_69482_MOESM1_ESM.pdf [file 41598_2020_69482_MOESM1_ESM.pdf]

# **Cognitive impairment and associated risk factors in older adult hemodialysis patients: A cross-sectional survey**

Yang Luo<sup>1,\*</sup>, Anne M Murray<sup>2</sup>, Yi-Dan Guo<sup>3</sup>, Ru Tian<sup>4</sup>, Peng-Peng Ye<sup>5</sup>, Xin Li<sup>6</sup>, Guo-Gang Li<sup>7</sup>, Fang-Ping Lu<sup>8</sup>, Ying-Chun Ma<sup>9</sup>, Yi Sun<sup>10</sup>, Yu-Zhu Wang<sup>11</sup>, Yue-Fei Xiao<sup>12</sup>, Qi-Meng Zhang<sup>13</sup>, Xue-Feng Zhao<sup>14</sup>, Hai-Dan Zhao<sup>15</sup>, Xiang-Mei Chen<sup>16\*</sup>

## **\* Co-correspondence to:**

Yang Luo, MD,

Department of Nephrology, Beijing Shijitan Hospital, Capital Medical University.

10 Tieyi Road, Haidian District, Beijing, 100038, China.

Phone: +86-010-63926891

Fax: +86-010-63926891

Email: luoyang96@163.com

Xiangmei Chen, MD

Department of Nephrology, Chinese PLA General Hospital, State Key Laboratory of

Kidney Disease, 28 Fuxing Road, Beijing 100853, China.

Phone: +86-010-66935462

Fax: +86-010-68130297

E-mail: xmchen301@126.com

| Characteristics          | Included (n=613)     | Excluded (n=57)      | P    |
|--------------------------|----------------------|----------------------|------|
| Age (years)              | 63.82±7.14           | 64.61±8.50           | 0.4  |
| Female sex               | 258(42.1%)           | 24(42.1%)            | 0.9  |
| Marital status           |                      |                      | 0.9  |
| Single                   | 53(8.6%)             | 6(10.5%)             |      |
| Married                  | 560(91.4%)           | 51(89.5%)            |      |
| Education level          |                      |                      | 0.01 |
| <6 years                 | 36(5.9%)             | 25(43.9%)            |      |
| 6-12 years               | 408(66.5%)           | 32(56.1%)            |      |
| >12 years                | 169(27.6%)           | 0(0%)                |      |
| Smoking history          |                      |                      | 0.7  |
| Never                    | 343(56.0%)           | 32(56.2%)            |      |
| Former                   | 186(30.3%)           | 15(26.3%)            |      |
| Current                  | 84(13.7%)            | 10(17.5%)            |      |
| Alcohol intake           |                      |                      | 0.04 |
| Never                    | 352(57.4%)           | 32(56.1%)            |      |
| Former                   | 233(38.0%)           | 18(31.6%)            |      |
| Current                  | 28(4.6%)             | 7(12.3%)             |      |
| Comorbidities            |                      |                      |      |
| Diabetes                 | 231(37.7%)           | 15(26.3%)            | 0.09 |
| Hypertension             | 545(88.9%)           | 53(93.0%)            | 0.3  |
| Stroke                   | 100(16.3%)           | 5(8.8%)              | 0.1  |
| CHD                      | 193(31.5%)           | 18(31.6%)            | 0.9  |
| HF                       | 104(17.0%)           | 4(7.0%)              | 0.7  |
| BMI (kg/m <sup>2</sup> ) | 23.60±4.11           | 24.09±3.73           | 0.4  |
| Dialysis vintage (mo.)   | 57.00(24.00, 101.50) | 63.50(21.25, 100.50) | 0.5  |
| Single-pool Kt/V         | 1.29±0.18            | 1.27±0.20            | 0.8  |
| Hb (g/L)                 | 11.11±1.46           | 11.02±1.49           | 0.6  |
| Alb (g/L)                | 39.93±3.18           | 40.29±2.61           | 0.4  |
| CRP (mg/L)               | 2.60(1.19, 7.05)     | 1.77(0.99, 4.67)     | 0.1  |
| Phosphate (mmol/L)       | 1.72±0.65            | 1.71±0.68            | 0.9  |
| iPTH (pg/mL)             | 271.17±249.85        | 244.00±172.97        | 0.3  |

**Table S1.** Demographics and clinical Characteristics of included and excluded patients. Data were presented as mean ± SD or median (interquartile range) for continuous variables, and number (%) for categorical variables. *Abbreviation:* CHD, coronary heart disease; HF, heart failure; BMI, body mass index; Kt/V, an indicator for evaluating dialysis adequacy; Hb, hemoglobin; ALB, albumin; CRP, C-reactive protein; iPTH, intact parathyroid hormone.

| Variables              | Hemodialysis vintage <36 months (n=204) |       |                                   |        | Hemodialysis vintage ≥ 36 months (n=409) |       |                                    |        |
|------------------------|-----------------------------------------|-------|-----------------------------------|--------|------------------------------------------|-------|------------------------------------|--------|
|                        | Mild cognitive impairment (n=69)        |       | Major cognitive impairment (n=78) |        | Mild cognitive impairment (n=159)        |       | Major cognitive impairment (n=190) |        |
|                        | OR (95% CI)*                            | P     | OR (95% CI)*                      | P      | OR (95% CI)*                             | P     | OR (95% CI)*                       | P      |
| Age (per 1-y increase) | 1.11(1.05, 1.19)                        | 0.001 | 1.15(1.08, 1.23)                  | <0.001 | 1.11(1.05, 1.17)                         | 0.01  | 1.14(1.08, 1.21)                   | <0.001 |
| Male sex               | 1.55(0.64, 3.74)                        | 0.3   | 0.89(0.35, 2.23)                  | 0.8    | 0.75(0.38, 1.48)                         | 0.4   | 1.02(0.52, 2.03)                   | 0.9    |
| Education level        |                                         |       |                                   |        |                                          |       |                                    |        |
| <6 y                   | 1.00(Reference)                         |       | 1.00(Reference)                   |        | 1.00(Reference)                          |       | 1.00(Reference)                    |        |
| 6~12 y                 | 2.58(0.22, 29.65)                       | 0.4   | 0.28(0.04, 1.79)                  | 0.2    | 1.21(0.28, 5.31)                         | 0.8   | 0.98(0.23, 4.22)                   | 0.9    |
| >12 y                  | 2.97(0.23, 37.62)                       | 0.4   | 0.71(0.10, 5.03)                  | 0.7    | 0.18(0.04, 0.78)                         | 0.02  | 0.19(0.04, 0.83)                   | 0.03   |
| Smoking history        |                                         |       |                                   |        |                                          |       |                                    |        |
| Never                  | 1.00(Reference)                         |       | 1.00(Reference)                   |        | 1.00(Reference)                          |       | 1.00(Reference)                    |        |
| Former                 | 0.86(0.29, 2.56)                        | 0.8   | 0.50(0.16, 1.59)                  | 0.2    | 0.69(0.24, 1.93)                         | 0.5   | 0.38(0.13, 1.08)                   | 0.07   |
| Current                | 0.50(0.12, 2.16)                        | 0.4   | 0.47(0.10, 2.08)                  | 0.3    | 0.60(0.19, 1.89)                         | 0.4   | 0.42(0.13, 1.34)                   | 0.1    |
| Alcohol intake         |                                         |       |                                   |        |                                          |       |                                    |        |
| Never                  | 1.00(Reference)                         |       | 1.00(Reference)                   |        | 1.00(Reference)                          |       | 1.00(Reference)                    |        |
| Former                 | 3.17(0.54, 18.53)                       | 0.2   | 1.14(0.38, 3.86)                  | 0.8    | 1.56(0.62, 3.96)                         | 0.3   | 1.27(0.5, 3.22)                    | 0.6    |
| Current                | 0.61(0.21, 1.74)                        | 0.4   | 0.59(0.07, 5.37)                  | 0.6    | 0.64(0.13, 3.18)                         | 0.6   | 0.33(0.06, 1.84)                   | 0.2    |
| Hypertension           | 2.55(0.75, 8.72)                        | 0.1   | 5.51(1.36, 22.27)                 | 0.02   | 1.06(0.37, 3.06)                         | 0.9   | 2.10(0.69, 6.41)                   | 0.2    |
| Diabetes               | 0.95(0.39, 2.31)                        | 0.9   | 1.01(0.40, 2.54)                  | 0.9    | 2.50(1.05, 5.97)                         | 0.04  | 2.77(1.16, 6.58)                   | 0.02   |
| Stroke                 | 6.59(1.73, 25.17)                       | 0.006 | 5.82(1.41, 24.07)                 | 0.02   | 4.19(0.83, 21.05)                        | 0.08  | 6.63(1.35, 32.55)                  | 0.02   |
| HD vintage (per 1-mon) | 1.02(0.98, 1.07)                        | 0.4   | 1.09(1.04, 1.14)                  | <0.001 | 1.01(1.00, 1.02)                         | 0.005 | 1.01(1.00, 1.02)                   | 0.01   |

|                                   |                  |       |                   |        |                  |     |                  |        |
|-----------------------------------|------------------|-------|-------------------|--------|------------------|-----|------------------|--------|
| increase)                         |                  |       |                   |        |                  |     |                  |        |
| Single-pool Kt/V (per 1 increase) | 0.01(0.00, 0.24) | 0.003 | 0.01 (0.00, 0.04) | <0.001 | 0.42(0.06, 2.84) | 0.4 | 0.02(0.00, 0.15) | <0.001 |
| Hb (per 1-g/L increase)           | 0.99(0.95, 1.03) | 0.6   | 0.98(0.94, 1.02)  | 0.3    | 1.01(0.98, 1.04) | 0.6 | 1.01(0.98, 1.04) | 0.7    |
| ALB (per 1-g/L increase)          | 0.98(0.79, 1.21) | 0.8   | 0.88(0.71, 1.07)  | 0.2    | 1.03(0.89, 1.19) | 0.7 | 0.96(0.83, 1.11) | 0.6    |
| CRP (per 1-mg/L increase)         | 1.03(0.94, 1.14) | 0.5   | 0.96(0.86,1.07)   | 0.5    | 1.01(0.97, 1.05) | 0.6 | 0.97(0.92, 1.02) | 0.2    |
| iPTH (per 1-pg/mL increase)       | 1.00(0.99, 1.00) | 0.8   | 1.00(0.99, 1.01)  | 0.9    | 1.00(0.99, 1.01) | 0.9 | 1.00(0.99, 1.01) | 0.2    |

**Table S2.** Risk factors for cognitive impairment stratified by hemodialysis vintage. \*Models were adjusted for age, sex, education level, smoking history, alcohol intake, comorbidities, hemodialysis vintage, Kt/V and the serum level of Hb, ALB, CRP, and iPTH. *Abbreviation:* OR, odds ratio; CI, confidence interval; HD, hemodialysis; Kt/V, an indicator for evaluating dialysis adequacy; Hb, hemoglobin; ALB, albumin; CRP, C-reactive protein; iPTH, intact parathyroid hormone.

| Variables                         | single-pool Kt/V <1.2 (n=195)    |      |                                    |      | single-pool Kt/V ≥1.2 (n=418)     |        |                                    |        |
|-----------------------------------|----------------------------------|------|------------------------------------|------|-----------------------------------|--------|------------------------------------|--------|
|                                   | Mild cognitive impairment (n=65) |      | Major cognitive impairment (n=104) |      | Mild cognitive impairment (n=163) |        | Major cognitive impairment (n=164) |        |
|                                   | OR (95% CI) *                    | P    | OR (95% CI) *                      | P    | OR (95% CI) *                     | P      | OR (95% CI) *                      | P      |
| Age (per 1-y increase)            | 7.89(1.42, 44.03)                | 0.02 | 8.30(1.49, 46.31)                  | 0.02 | 1.06(1.02, 1.10)                  | 0.005  | 1.08(1.04, 1.13)                   | <0.001 |
| Male sex                          | 7.26(0.34, 36.50)                | 0.08 | 3.07(0.33, 17.70)                  | 0.09 | 0.95(0.53, 1.69)                  | 0.9    | 1.05(0.58, 1.88)                   | 0.9    |
| Education level                   |                                  |      |                                    |      |                                   |        |                                    |        |
| <6 y                              | 1.00(Reference)                  |      | 1.00(Reference)                    |      | 1.00(Reference)                   |        | 1.00(Reference)                    |        |
| 6~12 y                            | 0.01(0.00, 5.47)                 | 0.2  | 0.00(0.00, 1.25)                   | 0.06 | 1.10(0.31, 3.98)                  | 0.9    | 0.85(0.24, 2.99)                   | 0.8    |
| >12 y                             | 2.90(0.00, 9.73)                 | 0.8  | 1.17(0.00, 5.45)                   | 0.9  | 0.26(0.07, 0.99)                  | 0.04   | 0.30(0.08, 1.10)                   | 0.07   |
| Smoking history                   |                                  |      |                                    |      |                                   |        |                                    |        |
| Never                             | 1.00(Reference)                  |      | 1.00(Reference)                    |      | 1.00(Reference)                   |        | 1.00(Reference)                    |        |
| Former                            | 10.97(0.09, 85.98)               | 0.3  | 7.79(0.07, 38.99)                  | 0.4  | 1.18(0.52, 2.71)                  | 0.7    | 0.65(0.27, 1.53)                   | 0.3    |
| Current                           | 0.16(0.00, 32.05)                | 0.5  | 0.20(0.00, 41.88)                  | 0.6  | 0.62(0.25, 1.53)                  | 0.3    | 0.40(0.16, 1.04)                   | 0.06   |
| Alcohol intake                    |                                  |      |                                    |      |                                   |        |                                    |        |
| Never                             | 1.00(Reference)                  |      | 1.00(Reference)                    |      | 1.00(Reference)                   |        | 1.00(Reference)                    |        |
| Former                            | 0.41(0.13, 13.25)                | 0.6  | 0.59(0.02, 19.71)                  | 0.8  | 0.81(0.32, 2.07)                  | 0.7    | 0.37(0.13, 1.02)                   | 0.06   |
| Current                           | 0.67(0.35, 4.97)                 | 0.5  | 1.56(0.55, 3.64)                   | 0.2  | 0.91(0.16, 4.13)                  | 0.3    | 1.50(0.20, 11.43)                  | 0.7    |
| Hypertension                      | 0.07(0.00, 9.37)                 | 0.3  | 0.10(0.00, 12.98)                  | 0.3  | 1.72(0.89, 3.31)                  | 0.1    | 1.74(0.90, 3.36)                   | 0.1    |
| Diabetes                          | 3.89(1.61, 8.46)                 | 0.04 | 7.82(1.51, 11.42)                  | 0.04 | 3.04(1.05, 8.79)                  | 0.04   | 4.47(1.57, 12.73)                  | 0.005  |
| Stroke                            | 0.41(0.01, 13.25)                | 0.6  | 0.59(0.02, 19.71)                  | 0.8  | 1.01(0.48, 2.11)                  | 0.9    | 0.76(0.36, 1.63)                   | 0.5    |
| HD vintage (per 1-mon increase)   | 1.11(1.01, 1.22)                 | 0.04 | 1.11(1.01, 1.23)                   | 0.03 | 1.01(1.01, 1.02)                  | <0.001 | 1.01(1.01, 1.02)                   | <0.001 |
| Single-pool Kt/V (per 1 increase) | 0.13(0.01, 4.41)                 | 0.2  | 0.13(0.00, 9.50)                   | 0.2  | 0.67(0.10, 4.35)                  | 0.7    | 0.03(0.00, 0.24)                   | 0.001  |
| ALB (per 1-g/L increase)          | 6.71(0.00, 28.37)                | 0.9  | 5.40(0.00, 22.84)                  | 0.9  | 0.94(0.83, 1.07)                  | 0.4    | 0.95(0.83, 1.08)                   | 0.4    |
| CRP (per 1-mg/L increase)         | 0.01(0.00, 2.85)                 | 0.9  | 0.01(0.00, 9.85)                   | 0.9  | 1.01(0.97, 1.04)                  | 0.8    | 0.98(0.93, 1.03)                   | 0.4    |

|                             |                  |     |                  |     |                 |     |                  |      |
|-----------------------------|------------------|-----|------------------|-----|-----------------|-----|------------------|------|
| iPTH (per 1-pg/mL increase) | 1.01(0.00, 7.90) | 0.9 | 1.01(0.02, 7.79) | 0.9 | 1.00(0.99,1.02) | 0.9 | 1.00(1.00, 1.03) | 0.06 |
|-----------------------------|------------------|-----|------------------|-----|-----------------|-----|------------------|------|

**Table S3.** Risk factors for cognitive impairment stratified by single-pool Kt/V. \*Models were adjusted for age, sex, education level, smoking history, alcohol intake, comorbidities, hemodialysis vintage, Kt/V and the serum level of Hb, ALB, CRP, and iPTH. *Abbreviation:* OR, odds ratio; CI, confidence interval; HD, hemodialysis; Kt/V, an indicator for evaluating dialysis adequacy; Hb, hemoglobin; ALB, albumin; CRP, C-reactive protein; iPTH, intact parathyroid hormone
